# Supplementary material for: Selective usage of ANP32 proteins by influenza B virus polymerase: Implications in determination of host range
Source: PubMed Central journal article supplement (PMC7580981; doi:10.1371/journal.ppat.1008989), 2020-10-12

**A**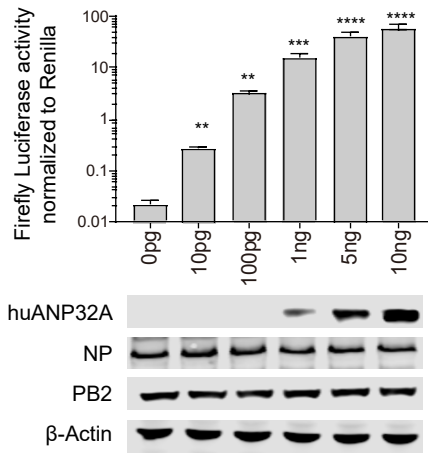**B**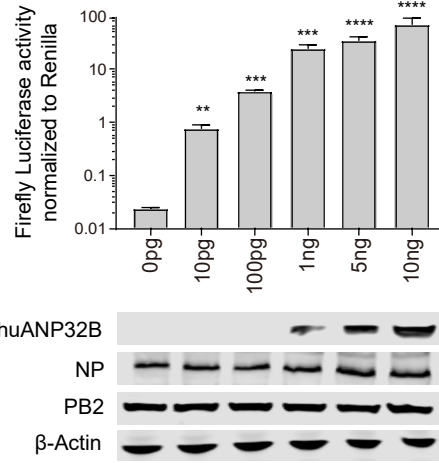**C**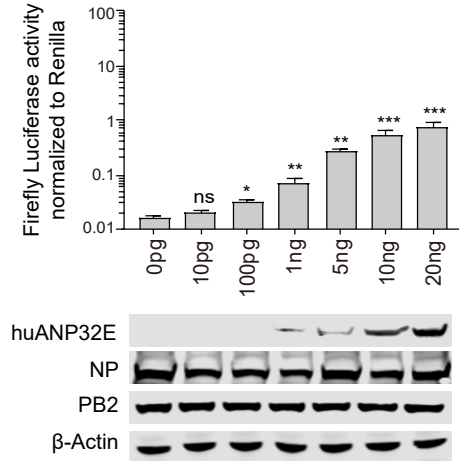

Supplement: ppat.1008989.s003.pdf [file ppat.1008989.s003.pdf]
