# Supplementary material for: Selective usage of ANP32 proteins by influenza B virus polymerase: Implications in determination of host range
Source: PubMed Central journal article supplement (PMC7580981; doi:10.1371/journal.ppat.1008989), 2020-10-12
Supplement: ppat.1008989.s005.pdf [file ppat.1008989.s005.pdf]

A

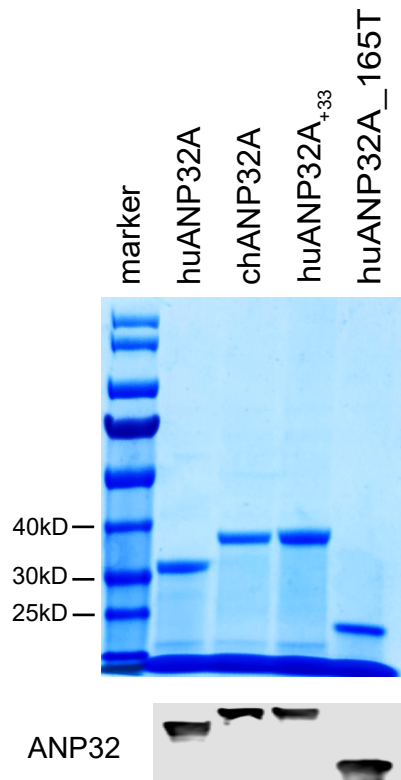

B

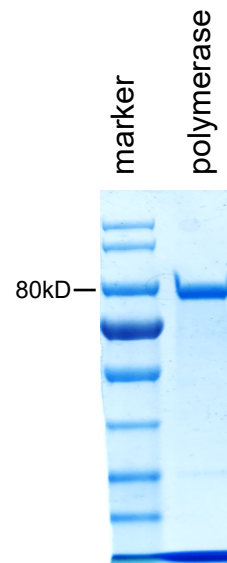

C

| Accession | Sum PEP Score | Coverage [%] | # Peptides | # PSMs | # Unique Peptides | # AAs | MW [kDa] | calc. pI | Score Sequest HT: Sequest HT | # Peptides (by Search Engine): Sequest HT |
|-----------|---------------|--------------|------------|--------|-------------------|-------|----------|----------|------------------------------|-------------------------------------------|
| IBV-PA    | 2097.644      | 87           | 156        | 1448   | 156               | 726   | 83.1     | 5.76     | 3907.8                       | 156                                       |
| IBV-PB2   | 1966.793      | 98           | 174        | 1341   | 174               | 770   | 87.9     | 9.17     | 3486.29                      | 174                                       |
| IBV-PB1   | 1315.823      | 76           | 115        | 892    | 115               | 752   | 84.3     | 8.53     | 2238.23                      | 115                                       |
