# Supplementary material for: Selective usage of ANP32 proteins by influenza B virus polymerase: Implications in determination of host range
Source: PLoS Pathog. 2020 Oct 12;16(10):e1008989. doi: 10.1371/journal.ppat.1008989 (PMC7580981; doi:10.1371/journal.ppat.1008989)
Supplement: S4 Fig — The protein sequences of ANP32A for human (huANP32A), pig (pgANP32A), equine (eqANP32A), dog (dgANP32A), ostrich(osANP32A), zebra finch (zbANP32A), duck (dkANP32A), turkey (tyANP32A), and chicken (chANP32A) were aligned using the Geneious R10 software. huANP32A was set as the reference sequence. The colors represent similarity of amino acid identity (Black = 100%, dark grey = 80–100%, light grey = 60–80%, white = <60%). Gaps are represented by dashes. Residue numbers correspond to huANP32A. (PDF) [file ppat.1008989.s004.pdf]

Sequence logos for ANP32A protein variants. The logos are organized into blocks corresponding to different regions of the protein: residues 1-60, 70-120, 130-190, and 200-287. A red line indicates an insertion of 33 amino acids (insert (33aa)) between residues 190 and 200. The logos show the conservation of amino acids across the different species, with huANP32A and pgANP32A showing the highest conservation.

**Residues 1-60:**

huANP32A: M E M G R R I H L E L R N R T P S D V K E L V L D N C R S N E G K I E G L T D E F E E L E F L S T I N V G L T S I A N L  
pgANP32A: M E M D K R I H L E L R N R T P S D V K E L V L D N C R S N E G K I E G L T D E F E E L E F L S T I N V G L T S V A N L  
eqANP32A: M D M D K R I H L E L R N R T P S D V K E L V L D N C R S N E G K I E G L T D E F E E L E F L S T I N V G L T S V A N L  
dgANP32A: M E M G R R I H L E L R N R T P S D V K E L V L D N C R S N E G K I E G L T D E F E E L E F L S T I N V G L T S V A N L  
osANP32A: M E F T S I S S Q L P D T W R P V D G E V V K E L V L D N C R S N E G K I E G L T D E F E E L E F L S T I N V G L T S V A N L  
zfANP32A: M E M K R R I H L E L R N R T P S D V K E L V L D N C R S N E G K I V G L T D E F E E L E F L S T I N V G L T S V A N L  
dkANP32A: M D M K K R I H L E L R N R T P S D V K E L V L D N C R S N E G K I E G L T D E F E E L E F L S T I N V G L T S V A N L  
tyANP32A: M E Q M A I A T V C V H L E - - - - R L A V K E L V L D N C R S N E G K I E G L T D E F E E L E F L S T I N V G L T S V A N L  
chANP32A: M D M K K R I H L E L R N R T P S D V K E L V L D N C R S N E G K I E G L T D E F E E L E F L S T I N V G L T S V A N L

**Residues 70-120:**

huANP32A: P K L N K L K K L E L S D N R V S G G L E V L A E K C P N I T H L N L S G N K I K D L S T I E P L K K I E N L K S L D L F N C E  
pgANP32A: P K L N K L K K L E L S D N R I S G G L E V L A E K C P N I T H L N L S G N K I K D L S T V E P L K K I E N L K S L D L F N C E  
eqANP32A: P K L N K L K K L E L S D N R I S G G L E V L A E K C P N I T H L N L S G N K I K D L S T I E P L K K I E N L K S L D L F N C E  
dgANP32A: P K L N K L K K L E L S D N R I S G G L E V L A E K C P N I T H L N L S G N K I K D L S T I E P L K K I E N L K S L D L F N C E  
osANP32A: P K L N K L K K L E L S D N R I S G G L E V L A E K C P N I T H L N L S G N K I K D L G T I E P L K K I E N L K S L D L F N C E  
zfANP32A: P K L N K L K K L E L G D N R I S G G L E V L A E K C P N I T H L N L S G N K I K D L G T I E P L K K I E N L K S L D L F N C E  
dkANP32A: P K L N K L K K L E L S D N R I S G G L E V L A E K C P N I T H L N L S G N K I K D L G T I E P L K K I E N L K S L D L F N C E  
tyANP32A: P K L N K L K K L E L S D N R V S G G L E V L A E K C P N I T H L N L S G N K I K D L G T I E P L K K I E N L K S L D L F N C E  
chANP32A: P K L N K L K K L E L S D N R V S G G L E V L A E K C P N I T H L N L S G N K I K D L G T I E P L K K I E N L K S L D L F N C E

**Residues 130-190:**

huANP32A: V T N L N D Y R E N V F K L L P O L T Y L D G Y - - - - - D R D D K E A  
pgANP32A: V T N L N D Y R E N V F K L L P O L T Y L D G Y - - - - - D R D D K E A  
eqANP32A: V T N L N D Y R E N V F K L L P O L T Y L D G Y - - - - - D R D D K E A  
dgANP32A: V T N L N D Y R E N V F K L L P O L T Y L D G Y - - - - - D R D D K E A  
osANP32A: V T N L N D Y R E N V F K L L P O L T Y L D G Y - - - - - D R D D K E A  
zfANP32A: V T N L N D Y R E N V F K L L P O L T Y L D G Y D R D D K E A P D S D A E G Y V E E L D D K E E D E D V L S L V K D R D D K E A  
dkANP32A: V T N L N D Y R E N V F K L L P O L T Y L D G Y D R D D K E A P D S D A E G Y V E G L D D E E E D E D V L S L V K D R D D K E A  
tyANP32A: V T N L N D Y R E N V F K L L P O L T Y L D G Y D R D D K E A P D S D A E G Y V E G L D D E E E D E D V L S L V K D R D D K E A  
chANP32A: V T N L N D Y R E N V F K L L P O L T Y L D G Y D R D D K E A P D S D A E G Y V E G L D D E E E D E D V L S L V K D R D D K E A

**Residues 200-287:**

huANP32A: P D S D A E G Y V E G L D D E E E D E D E E E Y D D A Q V V E D E E D E E E - E E E G E E E D V S G E E E E D E E G Y N D G E  
pgANP32A: S D S D A E G Y V E G L D D D E E E D E D E E E Y D D A Q V V E D E E D E E E - E E E G E E E D V S G E E E E D E E G Y N D G E  
eqANP32A: P D S D A E G Y V E G L D D D E E E D E D E E E Y D D A Q V V E D E E D E E E - E E E G E E E D V S G E E E E D E E G Y N D G E  
dgANP32A: P D S D A E G Y V E G L D D D E E E D E D E E E Y D D A Q V V E D E E D E E E - E E E G E E E D V S G E E E E D E E G Y N D G E  
osANP32A: P D S D A E G Y V E G L D D E E E D E D E E E Y D D A Q V V E D E E D E E E - E E E G E E E D V S G E E E E D E E G Y N D G E  
zfANP32A: P D S D A E G Y V E G L D D D E E E D E D E E E Y D D A Q V V E D E E D E E E - E E E G E E E D V S G E E E E D E E G Y N D G E  
dkANP32A: P D S D A E G Y V E G L D D D E E E D E D E E E Y D D A Q V V E D E E D E E E - E E E G E E E D V S G E E E E D E E G Y N D G E  
tyANP32A: P D S D A E G Y V E G L D D D E E E D E D E E E Y D D A Q V V E D E E D E E E - E E E G E E E D V S G E E E E D E E G Y N D G D  
chANP32A: P D S D A E G Y V E G L D D D E E E D E D E E E Y D D A Q V V E D E E D E E E - E E E G E E E D V S G E E E E D E E G Y N D G D

**Insert (33aa):**

huANP32A: V D D E E D E E E L G E E E R G Q K R K R E P E D E G E D D D  
pgANP32A: V D D E E D E E E P G E E E R G Q K R K R E P E D E G E D D D  
eqANP32A: V D D E E D E E D L G E E E R G Q K R K R E P E D E G E D D D  
dgANP32A: V D D E E D E E D V G E E E R G Q K R K R E P E D E G E D D D  
osANP32A: V D D E E D E E E L - D E E R G Q K R K R E P E D E G E D D D  
zfANP32A: V D D E E D E E E P - E E E R G Q K R K R E P E D E G E D D D  
dkANP32A: V D D E E D E E E P - D E E R G Q K R K R E P E D E G E D D D  
tyANP32A: V D D E E D E E E P - D E E R G Q K R K R E P E D E G E D D D  
chANP32A: V D D E E D E E E P - D E E R G Q K R K R E P E D E G E D D D
